# Supplementary material for: Metabolic Fingerprints from the Human Oral Microbiome Reveal a Vast Knowledge Gap of Secreted Small Peptidic Molecules
Source: PubMed Central journal article supplement (PMC5516222; doi:10.1128/msystems.00058-17), 2017-07-18
Supplement: sys004172116sf1.pdf [file sys004172116sf1.pdf]

16 5H 24H 48H/ 72H/ 96H  
SHI cdm cdm 52H 76H cdm  
cdm cdm

16H 5H 24H 48H/ 72H/ 96H  
SHI cdm cdm 52H 76H cdm  
cdm cdm

*Actinomyces bovis*  
(ATCC®1368™)  
*Actinomyces meyeri*  
(ATCC®35568™)  
*Actinomyces naeslundii*  
OMZ 724  
*Actinomyces odontolyticus*  
(ATCC®17929™)

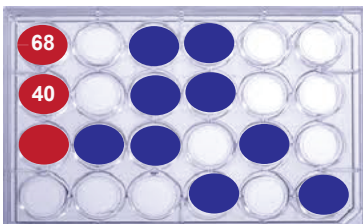

*Actinomyces odontolyticus*  
(ATCC®17982™)  
*Actinomyces viscosus*  
(ATCC®15987™)

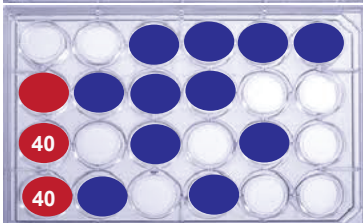

*Fusobacterium nucleatum*  
23726  
*Fusobacterium nucleatum*  
Oral Taxon 420

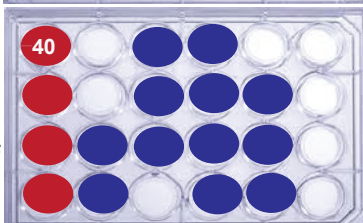

*Fusobacterium periodontium*  
1A 54-D1  
*Streptococcus mitis* bv2 str.  
(ATCC®F0392™)  
*Streptococcus parasanguinis*  
(ATCC®15911™)  
*Streptococcus gordonii*  
(ATCC®10558™)

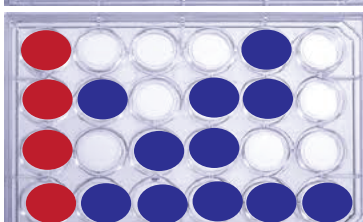

*Streptococcus infantis*  
HOT-638  
*Streptococcus mutans*  
UA159  
*Streptococcus oralis*  
HOT-707  
*Streptococcus pneumoniae*  
str. TCH8431

*Streptococcus sanguinis*  
VMC66  
*Streptococcus sobrinus*  
OMZ177  
*Streptococcus* sp.  
C150  
*Streptococcus vestibularis*  
str. F0396

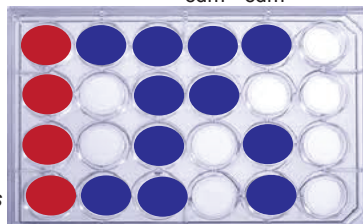

*Porphyromonas gingivalis*  
str. F0568  
*Veillonella* sp.  
str. 6 1 27  
*Veillonella* sp.  
Oral Taxon 158 str. F0412  
*Actinomyces* sp.  
XH001

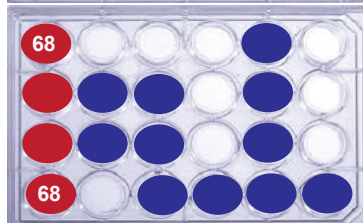

*Veillonella parvula*  
SHI-1  
*Lactobacillus fermentum*  
Lf SHI-2  
*Streptococcus salivarius*  
Ssal SHI-3  
*in vitro* biofilm

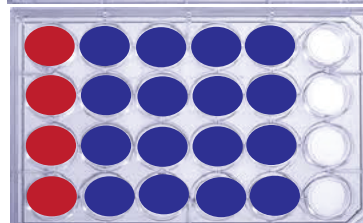

Fig. S1
