# Supplementary material for: Metabolic Fingerprints from the Human Oral Microbiome Reveal a Vast Knowledge Gap of Secreted Small Peptidic Molecules
Source: PubMed Central journal article supplement (PMC5516222; doi:10.1128/msystems.00058-17), 2017-07-18
Supplement: sys004172116sf3.pdf [file sys004172116sf3.pdf]

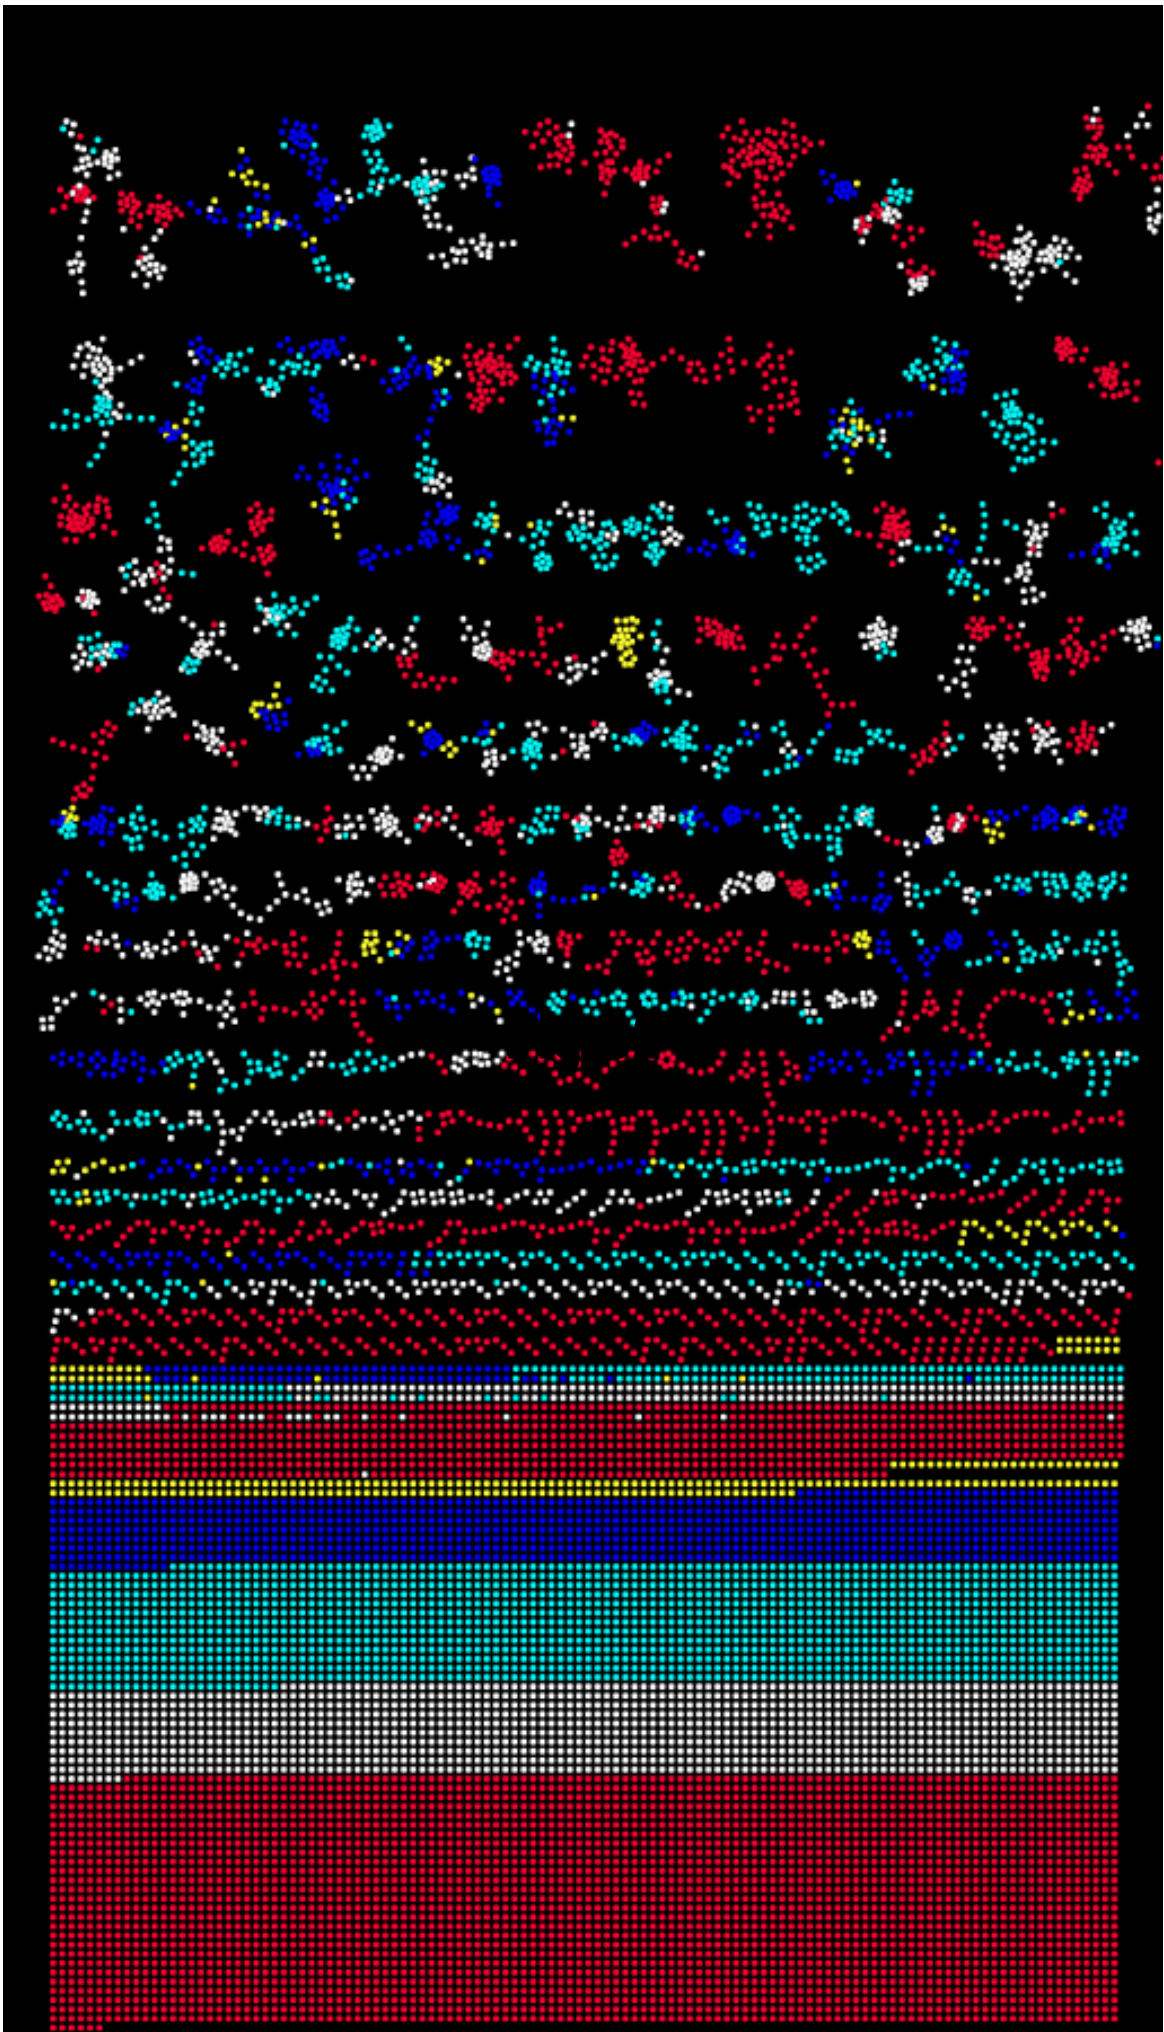

Fig. S3
